# Supplementary material for: Statins in Acute Ischemic Stroke: A Systematic Review
Source: PubMed Central journal article supplement — J Stroke. 2015 Sep 30;17(3):282–301. doi: 10.5853/jos.2015.17.3.282 (PMC4635713; doi:10.5853/jos.2015.17.3.282), 2015-09-30
Supplement: jos-17-3-282-supple9.pdf [file jos-17-3-282-supple9.pdf]

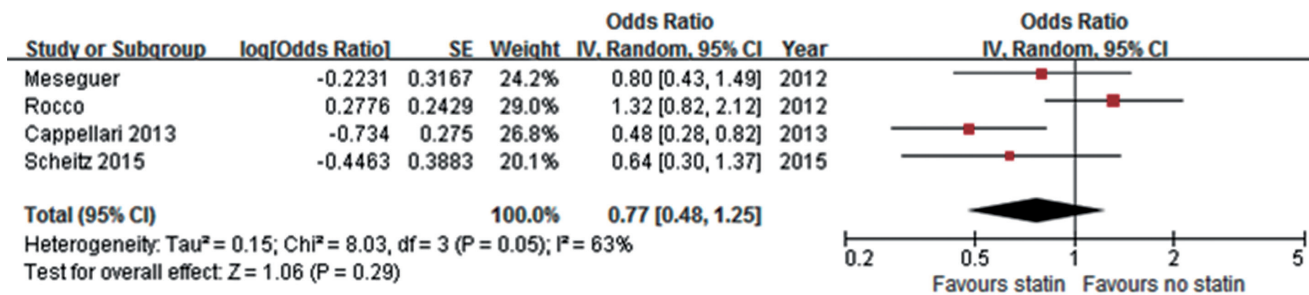

Supplemental Figure 9. Statin effect on mortality in patients with thrombolysis. Pooling 4 studies providing adjusted ORs.
